# Supplementary material
Source: HighWire-hosted journal article supplement (https://www.cmajopen.ca/highwire/filestream/81254/field_highwire_adjunct_files/2/2019-0101-3-at.pdf)
Supplement: 2019-0101-3-at.pdf [file 2019-0101-3-at.pdf]

**Appendix 3 (as supplied by the authors): Variables potentially affecting use of opioids for 1st line moderate pain management in the ED and for moderate and severe pain at home use**

| Variables                                                       | Opioids for moderate 1 <sup>st</sup> line in ED |                       |         | Opioids for moderate/severe at home use |                       |         |
|-----------------------------------------------------------------|-------------------------------------------------|-----------------------|---------|-----------------------------------------|-----------------------|---------|
|                                                                 | Odds ratio                                      | 95% CI for odds ratio | p-value | Odds ratio                              | 95% CI for odds ratio | p-value |
| <b>PEM training (yes vs no)</b>                                 | 1.03                                            | 0.52-2.04             | 0.93    | 0.92                                    | 0.47-1.81             | 0.80    |
| <b>Age</b>                                                      | 1.03                                            | 0.98-1.08             | 0.24    | 1.01                                    | 0.96-1.05             | 0.84    |
| <b>Sex *(female vs male)</b>                                    | 0.71                                            | 0.33-1.52             | 0.38    | 0.77                                    | 0.36-1.65             | 0.51    |
| <b>Years in practice</b>                                        | 1.04                                            | 0.99-1.09             | 0.13    | 1.03                                    | 0.99-1.08             | 0.20    |
| <b>% Pediatric patients in practice</b>                         | 1.02                                            | 1.00-1.04             | 0.10    | 0.99                                    | 0.96-1.01             | 0.17    |
| <b>Personal history of medical opioid use*</b>                  | 0.95                                            | 0.44-2.06             | 0.90    | 0.57                                    | 0.26-1.22             | 0.15    |
| <b>Family history of medical opioid use*</b>                    | 1.18                                            | 0.54-2.60             | 0.68    | 1.52                                    | 0.69-3.39             | 0.31    |
| <b>Reported knowledge for safe opioid use in children in ED</b> | 0.99                                            | 0.97-1.01             | 0.19    | 0.99                                    | 0.98-1.01             | 0.65    |
| <b>Degree of worry for opioid severe adverse events</b>         | 0.99                                            | 0.98-1.01             | 0.35    | 0.99                                    | 0.98-1.01             | 0.41    |
| <b>Degree of worry for opioid dependence</b>                    | 0.99                                            | 0.98-1.01             | 0.52    | 1.00                                    | 0.98-1.02             | 0.95    |
| <b>Degree of worry for opioid addiction</b>                     | 0.99                                            | 0.97-1.01             | 0.27    | 0.99                                    | 0.98-1.01             | 0.45    |
| <b>ED opioid protocol</b>                                       |                                                 |                       | 0.23    |                                         |                       | 0.07    |
| <b>I don't know vs Yes</b>                                      | 0.66                                            | 0.16-2.51             | 0.95    | 0.14                                    | 0.02-0.66             | 0.05    |
| <b>No vs Yes</b>                                                | 0.41                                            | 0.12-1.27             | 0.09    | 0.18                                    | 0.03-0.72             | 0.13    |

ED: Emergency Department

PEM: Pediatric Emergency Medicine

\* Category "decline to answer" was removed from variable due to very low count

p<0.05 was considered statistically significant
